# Supplementary material for: Effects of leptin on the viability of human ovarian cancer cells and changes in cytokine expression levels
Source: PeerJ. 2023 Apr 20;11:e15246. doi: 10.7717/peerj.15246 (PMC10122840; doi:10.7717/peerj.15246)
Supplement: Supplemental Information 5 [file peerj-11-15246-s005.xlsx]

## Sheet: Sayfa1
OVCAR-3 SİTOKİN ARRAY 1 SONUÇLARI
Sitokinin Adı		Değişim Miktarı
GM-CSF		3.1
Gro a/b/g		1.95
Gro alfa (CXCL1)		2.2
IL-1 (IL-1 F1)		2.9
IL-2		-2.1
IL-3		-1.8
IL-5		-2.4
IL-8 (CXCL 8)		1.6
IL-10		2.3
IL-12 (p40/p70)		1.7
IL-13		1.7
MIG (CXCL9)		-2.3
MIP-1 delta		-2.1
TNF beta (TNFSF 1B)		-1.8
EGF		1.9
PDGF-BB		2.1
BDNF		1.7
BLC (CXCL 13)		1.8
Ck beta 8-1 (CCL23)		-1.8
Eotaxin-1 (CCL11)		1.7
FGF-6		1.8
GCP-2 (CXCL6 )		1.7
IGFBP-1		1.9
IGFBP-3		2.4
LIGHT (TNFSF14)		1.6
MCP-4 (CCL13)		3.7
NT-4		3.3
PLGF		2.9
TGF beta 3		6.6
