# Supplementary material for: Effects of leptin on the viability of human ovarian cancer cells and changes in cytokine expression levels
Source: PeerJ. 2023 Apr 20;11:e15246. doi: 10.7717/peerj.15246 (PMC10122840; doi:10.7717/peerj.15246)
Supplement: Supplemental Information 6 [file peerj-11-15246-s006.xlsx]

## Sheet: Sayfa1
MDAH-2774 SİTOKİN ARRAY 1 SONUÇLARI
Sitokinin Adı		Değişim Miktarı
ENA-78 (CXCL5)		-3.6
G-CSF		-2.1
IL-2		-2.6
IL-3		-2.5
IL-10		-2.3
IFN-gamma		-1.9
MCP-2 (CCL8)		-2.4
MCP-3 (CCL7)		-2.2
MIG (CXCL9)		8.8
VEGF-A		-2
PDGF-BB		-2.2
BDNF		-1.6
Eotaxin-1 (CCL11)		-2.3
FGF-4		1.7
FLT-3 Ligand		-2.1
IGFBP-2		-2
IL-16		1.8
MCP-4 (CCL13)		-1.7
NAP-2 (CXCL7)		-1.7
OPN (SPP1)		-1.9
PLGF		-1.9
TGF beta 3		2
